# Supplementary material
Source: PubMed Central journal article supplement (PMC8804873)
Supplement: sj-pdf-3-car-10.1177_1947603520982350.pdf [file sj-pdf-3-car-10.1177_1947603520982350.pdf]

1 **Supplementary File**

2

3 **Method 1**

4 ***Hindlimb suspension***

5 Rats in the HS and HS-OA groups were subjected to tail suspension for 4 weeks.

6 Hindlimb suspension was performed according to the tail-suspension method described  
7 in our previous studies<sup>1-3</sup>. Briefly, under inhalation anesthesia with isoflurane, the tail of  
8 each rat was disinfected. A sterile steel wire was then used to drill into the proximal  
9 coccyx in which the wire remained and was shaped into a ring. The tail ring was then  
10 connected to a track hung above the cage by using another wire, thereby enabling the  
11 animals to move freely on their forelimbs in the cage. The head-down tilt angle was  
12 monitored throughout the experimental period and remained at approximately 30°<sup>4</sup>.

13

14 ***Surgical induction of OA***

15 The same highly experienced operators (IT and KT) performed all DMM surgeries.  
16 The DMM was induced by transecting the medial meniscotibial ligament (MMTL) in  
17 the left knee joint as described previously<sup>5-7</sup>. Anesthesia was induced via isoflurane  
18 inhalation, and both knees were shaved and disinfected. Both knee joints were exposed

19 after making a 3-cm skin incision and a 1-cm medial capsular incision with a #15 blade  
20 (Feather Safety Razor Co., Ltd., Osaka, Japan). When it was difficult to secure the  
21 visual field because of bleeding, the bleeding was stopped by pressing the bleeding site  
22 with a swab soaked with adrenaline (Bosmin solution; Daiichi Sankyo Co., Ltd., Tokyo,  
23 Japan)<sup>5</sup>. While the patellar tendon and fat pad were pulled and shifted laterally with  
24 forceps (without dislocating the patella), we confirmed that the MMTL was exposed.  
25 Then, the MMTL was transected with a #15 blade, and with each surgical procedure, we  
26 confirmed that the medial meniscus had displaced medially and that the instability had  
27 been induced. After thoroughly washing the surgical site with saline, we closed the  
28 articular capsule and skin incisions with 5-0 nylon (Akiyama Medical Manufacturing  
29 Co., Ltd., Tokyo, Japan). For internal controls, a sham operation was performed on the  
30 right knee joint by using the same approach without MMTL transection. A previous  
31 study reported that there was no significant difference in OA severity between sham  
32 operated and age-matched unoperated control joints<sup>8</sup>.

33

#### 34 ***Histomorphometrical analyses***

35 To evaluate the cartilage thickness, intensity of matrix staining with toluidine blue,  
36 chondrocyte density, and osteophyte length, we used Adobe Photoshop CC imaging

37 software (Adobe Systems, Inc., San Jose, CA, USA) and measured these parameters<sup>2,4,9</sup>.

38 For evaluation of cartilage thickness, staining intensity and chondrocyte density in the  
39 OA and HS-OA groups, 1 section with the highest OARSI score among 3 sections was  
40 chosen. For evaluation of osteophyte length in the OA and HS-OA groups, 1 section  
41 with the longest osteophyte among 3 sections was chosen.

42 To evaluate cartilage thickness, digitized images of the sections stained with toluidine  
43 blue were used<sup>1-3</sup>. The cartilage thickness was defined as the distance between the  
44 cartilage surface and the osteochondral junction. We measured the area of the cartilage  
45 with a width of 1 mm in the center of the lesion at the tibia in the medial tibiofemoral  
46 joint and used this value as the average cartilage thickness. In the CON and HS groups,  
47 we measured the area of the cartilage with a width of 1 mm in the center at the tibia in  
48 the medial tibiofemoral joint.

49 To evaluate matrix intensity, digitized images of cartilage stained with toluidine blue  
50 were converted to greyscale (white, 255; black, 0) to assess the relative intensity of  
51 toluidine blue staining. The average staining intensity was calculated at the same area in  
52 the same manner as performed for the measurement of articular cartilage thickness.

53 To evaluate chondrocyte density, digitized images of the sections stained hematoxylin  
54 and eosin were used. Chondrocyte density was determined as the number of

55 chondrocytes per unit area of cartilage. This unit area was calculated by using the same  
56 method as used for the above cartilage thickness, and the width to be measured was set  
57 to 200 µm. Chondrocytes with visible nuclei within the area of interest were counted  
58 manually.

59 To evaluate osteophyte formation of the tibia in the medial tibiofemoral joint, we  
60 used digitized images of sections stained with toluidine blue and measured the length  
61 from the deepest point of its base at the chondro-osseous junction to the surface of the  
62 overlying cartilage at its thickest point<sup>10</sup>.

63

#### 64 References

- 65 1. Takahashi I, Matsuzaki T, Kuroki H, Hosono M. Joint unloading inhibits articular  
66 cartilage degeneration in knee joints of a monosodium iodoacetate-induced rat model of  
67 osteoarthritis. *Osteoarthr Cartil.* 2019;27(7):1084-1093.
- 68 2. Takahashi I, Matsuzaki T, Kuroki H, Hosono M. Disuse histological changes of an  
69 unloading environment on joint components in rat knee joints. *Osteoarthr Cartil Open.*  
70 2019;1(1-2):PubMed: [100008](#).
- 71 3. Takahashi I, Matsuzaki T, Yoshida S, Kitade I, Hosono M. Differences in cartilage  
72 repair between loading and unloading environments in the rat knee. *J Jpn Phys Ther*

73 *Assoc.* 2014;17(1):22-30.

74 4. Nomura M, Sakitani N, Iwasawa H, Kohara Y, Takano S, Wakimoto Y, Kuroki H,  
75 Moriyama H.. Thinning of articular cartilage after joint unloading or immobilization. An  
76 experimental investigation of the pathogenesis in mice. *Osteoarthr Cartil.*  
77 2017;25(5):727-736.

78 5. Glasson SS, Blanchet TJ, Morris EA. The surgical destabilization of the medial  
79 meniscus (DMM) model of osteoarthritis in the 129/SvEv mouse. *Osteoarthr Cartil.*  
80 2007;15(9):1061-1069.

81 6. Ulici V, Kelley KL, Azcarate-Peril MA, Cleveland RJ, Sartor RB, Schwartz TA,  
82 Loeser RF. Osteoarthritis induced by destabilization of the medial meniscus is reduced  
83 in germ-free mice. *Osteoarthr Cartil.* 2018;26(8):1098-1109.

84 7. Iijima H, Aoyama T, Ito A, Tajino J, Nagai M, Zhang X, Yamaguchi S, Akiyama H,  
85 Kuroki H. Destabilization of the medial meniscus leads to subchondral bone defects and  
86 site-specific cartilage degeneration in an experimental rat model. *Osteoarthr Cartil.*  
87 2014;22(7):1036-1043.

88 8. Loeser RF, Olex AL, McNulty MA, Carlson CS, Callahan MF, Ferguson CM, Chou J,  
89 Leng X, Fetrow JS. Microarray analysis reveals age-related differences in gene  
90 expression during the development of osteoarthritis in mice. *Arthritis Rheum.*

91 2012;64(3):705-717.

92 9. Iijima H, Aoyama T, Ito A, Tajino J, Nagai M, Zhang X, Yamaguchi S, Akiyama H,  
93 Kuroki H. Immature articular cartilage and subchondral bone covered by menisci are  
94 potentially susceptible to mechanical load. *BMC Musculoskelet Disord.* 2014;15:101.

95 10. Gerwin N, Bendele AM, Glasson S, Carlson CS. The OARSI histopathology  
96 initiative—recommendations for histological assessments of osteoarthritis in the rat.  
97 *Osteoarthr Cartil.* 2010;18(suppl 3):S24-S34.

98

99

100

101

102

103

104

105

106

107

108

| Grade | Description                                                                                                                                                                                                                                                                                                                                                                     |
|-------|---------------------------------------------------------------------------------------------------------------------------------------------------------------------------------------------------------------------------------------------------------------------------------------------------------------------------------------------------------------------------------|
| 0     | No changes.                                                                                                                                                                                                                                                                                                                                                                     |
| 1     | <p>Increased basophilia at tidemark.</p> <p>No fragmentation of tidemark.</p> <p>No marrow changes or, if present, minimal and focal.</p> <p>Increased thickening of subchondral bone subjacent to the area of greatest articular cartilage lesion severity.</p>                                                                                                                |
| 2     | <p>Increased basophilia at tidemark.</p> <p>Minimal to mild focal fragmentation of calcified cartilage of tidemark.</p> <p>Mesenchymal change in marrow (fibroblastic cells) involving approximately 1/4 of the subchondral region under the lesion.</p> <p>Increased thickening of subchondral bone subjacent to the area of greatest articular cartilage lesion severity.</p> |
| 3     | <p>Increased basophilia at tidemark.</p> <p>Mild to marked fragmentation (multiple larger areas) of calcified cartilage/subchondral bone loss Mesenchymal change in marrow in up to 3/4 of the total area.</p> <p>Areas of marrow chondrogenesis may be evident but no major collapse of articular cartilage into epiphyseal bone (definite depression in the surface).</p>     |
| 4     | <p>Increased basophilia at tidemark.</p> <p>Marked to severe fragmentation of calcified cartilage.</p>                                                                                                                                                                                                                                                                          |

---

Marrow mesenchymal change involves up to 3/4 of the area.

Articular cartilage has collapsed into the epiphysis to a depth of  $\leq 250$  mm from the tidemark (see definite depression in the surface cartilage).

---

Increased basophilia at the tidemark.

Marked to severe fragmentation of calcified cartilage.

5 Marrow mesenchymal change involves up to 3/4 of the area.

Articular cartilage has collapsed into the epiphysis to a depth of  $>250$  mm from the tidemark.

---

110 Calcified cartilage and subchondral bone damage score

111

112

113

114

115

116

117

118

119

120

121



122 **Result 1. Changes in the body weights (g) of the rats throughout the experiment**

123 **Preliminary study of cartilage atrophy under the unloading condition.**

|                     | CON group                      | HS group                        |
|---------------------|--------------------------------|---------------------------------|
| At experiment start | 284.6 ± 5.8<br>(277.3–291.8)   | 287.2 ± 10.4<br>(274.1–300.2)   |
| At 4 weeks          | 410.0 ± 15.0*<br>(391.2–428.7) | 344.6 ± 19.5*†<br>(320.2–368.9) |

124

125 **At 2 weeks**

|            | OA group                      | HS-OA group                    |
|------------|-------------------------------|--------------------------------|
| At DMM     | 421.0 ± 14.3<br>(403.1–438.8) | 359.8 ± 13.6‡<br>(342.8–376.7) |
| At 2 weeks | 431.6 ± 17.3<br>(410.1–453.0) | 376.8 ± 12.5‡<br>(361.8–392.4) |

126

127 **At 4 weeks**

|            | OA group                      | HS-OA group                    |
|------------|-------------------------------|--------------------------------|
| At DMM     | 378.4 ± 10.9<br>(364.8–391.9) | 330.4 ± 14.3‡<br>(312.5–348.2) |
| At 4 weeks | 429.0 ± 21.2<br>(402.5–455.4) | 403.4 ± 16.4<br>(383.0–423.7)  |

128 \* Significant differences from baseline for the same group.

129 † Significant differences from CON group at the same experimental period.

130 ‡ Significant differences from OA group at the same experimental period.

131  $P < .05$  for all.

132

133

134

135

136

137

138

139

140

141

142

143

144

145

146

147 **Result 2. Cartilage atrophy**

148 **Thickness of the articular cartilage ( $\mu\text{m}$ )**

|            | CON group                         | HS group                           |
|------------|-----------------------------------|------------------------------------|
| At 4 weeks | 395.1 $\pm$ 21.0<br>(380.1–410.1) | 355.0 $\pm$ 19.7*<br>(340.9–369.2) |

149

150 **Matrix staining by toluidine blue (pixel value)**

|            | CON group                      | HS group                       |
|------------|--------------------------------|--------------------------------|
| At 4 weeks | 42.8 $\pm$ 11.0<br>(34.9–50.7) | 61.2 $\pm$ 8.5*<br>(55.1–67.3) |

151 Mean  $\pm$  SD (95% CI)

152 \* Significant differences from CON group at the same experimental period.

153  $P < .05$  for all.

154

155

156

157

158

159

160 **Result 3. Histological scores**

161 **Maximum OARSI score**

|            | OA group     | HS-OA group  |
|------------|--------------|--------------|
| At 2 weeks | 4 (3–7.5)    | 6 (6–10.5)   |
| At 4 weeks | 8 (6–9)      | 16 (14–16) * |
| At 8 weeks | 12 (10.5–12) | 16 (12–16) * |

162

163 **Summed OARSI score**

|            | OA group     | HS-OA group    |
|------------|--------------|----------------|
| At 2 weeks | 8 (5.5–11)   | 12 (10.5–15) * |
| At 4 weeks | 17 (15.5–19) | 22 (20–25) *   |
| At 8 weeks | 20 (17.5–26) | 36 (29–40) *   |

164

165 **Subchondral bone damage score**

|            | OA group | HS-OA group |
|------------|----------|-------------|
| At 2 weeks | 0 (0–0)  | 0 (0–0)     |
| At 4 weeks | 0 (0–1)  | 0 (0–1)     |
| At 8 weeks | 1(0–1)   | 2(1–2.5) *  |

166 Median (lower quartile–upper quartile)

167 \* Significant differences from Con group during the same experimental period.

168  $P < .05$  for all.

169 **Supplementary Result 4. Histomorphometrical analyses**

170 **Cartilage thickness ( $\mu\text{m}$ )**

|            | OA group                          |                                     | HS-OA group                        |                                     |
|------------|-----------------------------------|-------------------------------------|------------------------------------|-------------------------------------|
|            | Operated                          | Sham                                | Operated                           | Sham                                |
| At 2 weeks | 332.7 $\pm$ 27.2<br>(298.9–366.5) | 428.0 $\pm$ 30.0**<br>(390.7–465.4) | 264.6 $\pm$ 18.7*<br>(241.3–287.9) | 424.8 $\pm$ 32.4**<br>(384.6–465.1) |
| At 4 weeks | 253.2 $\pm$ 39.7<br>(203.9–302.6) | 391.1 $\pm$ 33.3**<br>(349.7–432.5) | 249.9 $\pm$ 48.3<br>(189.9–309.9)  | 397.7 $\pm$ 10.4**<br>(384.7–410.7) |
| At 8 weeks | 261.1 $\pm$ 46.3<br>(203.5–318.6) | 360.7 $\pm$ 34.4**<br>(317.9–403.5) | 233.6 $\pm$ 27.9<br>(198.8–268.3)  | 385.2 $\pm$ 17.0**<br>(364.0–406.3) |

171

172 **Matrix intensity (pixel value)**

|            | OA group                        |                                  | HS-OA group                     |                                 |
|------------|---------------------------------|----------------------------------|---------------------------------|---------------------------------|
|            | Operated                        | Sham                             | Operated                        | Sham                            |
| At 2 weeks | 44.5 $\pm$ 17.6<br>(22.6–66.4)  | 40.3 $\pm$ 9.0<br>(29.1–51.5)    | 65.3 $\pm$ 9.2*<br>(53.9–76.8)  | 42.8 $\pm$ 2.0**<br>(40.3–45.4) |
| At 4 weeks | 71.1 $\pm$ 25.6<br>(39.3–103.0) | 41.1 $\pm$ 10.5**<br>(28.0–54.3) | 83.7 $\pm$ 13.5<br>(66.9–100.5) | 35.9 $\pm$ 7.5**<br>(26.5–45.4) |
| At 8 weeks | 70.4 $\pm$ 13.3<br>(53.9–87.0)  | 37.0 $\pm$ 5.5**<br>(30.1–43.9)  | 78.9 $\pm$ 24.4<br>(48.5–109.3) | 34.0 $\pm$ 4.4**<br>(28.4–39.6) |

173

174

175 **Chondrocyte density (cells/mm<sup>2</sup>)**

|            | OA group                       |                                    | HS-OA group                    |                                    |
|------------|--------------------------------|------------------------------------|--------------------------------|------------------------------------|
|            | Operated                       | Sham                               | Operated                       | Sham                               |
| At 2 weeks | 869.2 ± 92.4<br>(754.4–984.1)  | 1150.6 ± 186.1**<br>(919.5–1381.7) | 616.7 ± 59.3*<br>(542.9–690.4) | 1062.5 ± 57.1**<br>(991.5–1133.4)  |
| At 4 weeks | 679.5 ± 160.8<br>(479.8–879.2) | 1016.6 ± 98.8**<br>(893.9–1139.4)  | 741.3 ± 169.0<br>(531.4–951.2) | 1131.9 ± 88.5**<br>(1022.0–1241.8) |
| At 8 weeks | 670.9 ± 88.2<br>(561.2–780.5)  | 1120.6 ± 146.6**<br>(938.5–1302.8) | 555.8 ± 84.4<br>(451.0–660.7)  | 1155.1 ± 99.4**<br>(1031.7–1278.6) |

176

177 **Osteophyte length (µm)**

|            | OA group                      |                                 | HS-OA group                    |                                 |
|------------|-------------------------------|---------------------------------|--------------------------------|---------------------------------|
|            | Operated                      | Sham                            | Operated                       | Sham                            |
| At 2 weeks | 317.3 ± 76.8<br>(221.8–412.7) | 181.5 ± 13.9**<br>(164.1–198.8) | 252.1 ± 52.6<br>(186.7–317.5)  | 164.7 ± 26.4<br>(131.8–197.5)   |
| At 4 weeks | 350.6 ± 55.4<br>(281.8–419.4) | 201.8 ± 20.9**<br>(175.8–227.9) | 325.0 ± 31.9<br>(285.4–364.6)  | 215.1 ± 14.4**<br>(197.2–233.0) |
| At 8 weeks | 456.5 ± 73.1<br>(365.6–547.4) | 176.4 ± 25.7**<br>(144.4–208.4) | 412.7 ± 107.2<br>(279.6–545.9) | 155.5 ± 18.4**<br>(132.6–178.4) |

178 Mean ± SD (95% CI)

179 \* Significant differences from OA group during the same experimental period.

180 \*\* Significant differences from operated limb of the same group during the same

181 experimental period.

182  $P < .05$  for all.
